# Supplementary material for: Trichoplax genomes reveal profound admixture and suggest stable wild populations without bisexual reproduction
Source: Sci Rep. 2018 Jul 24;8:11168. doi: 10.1038/s41598-018-29400-y (PMC6057997; doi:10.1038/s41598-018-29400-y)
Supplement: Supplementary file 1 — Supplementary Information [file 41598_2018_29400_MOESM1_ESM.pdf]

***Trichoplax* genomes reveal profound admixture and suggest stable wild populations without bisexual reproduction**

**Kai Kamm\*, Hans-Jürgen Osigus, Peter F. Stadler, Rob DeSalle, Bernd Schierwater**

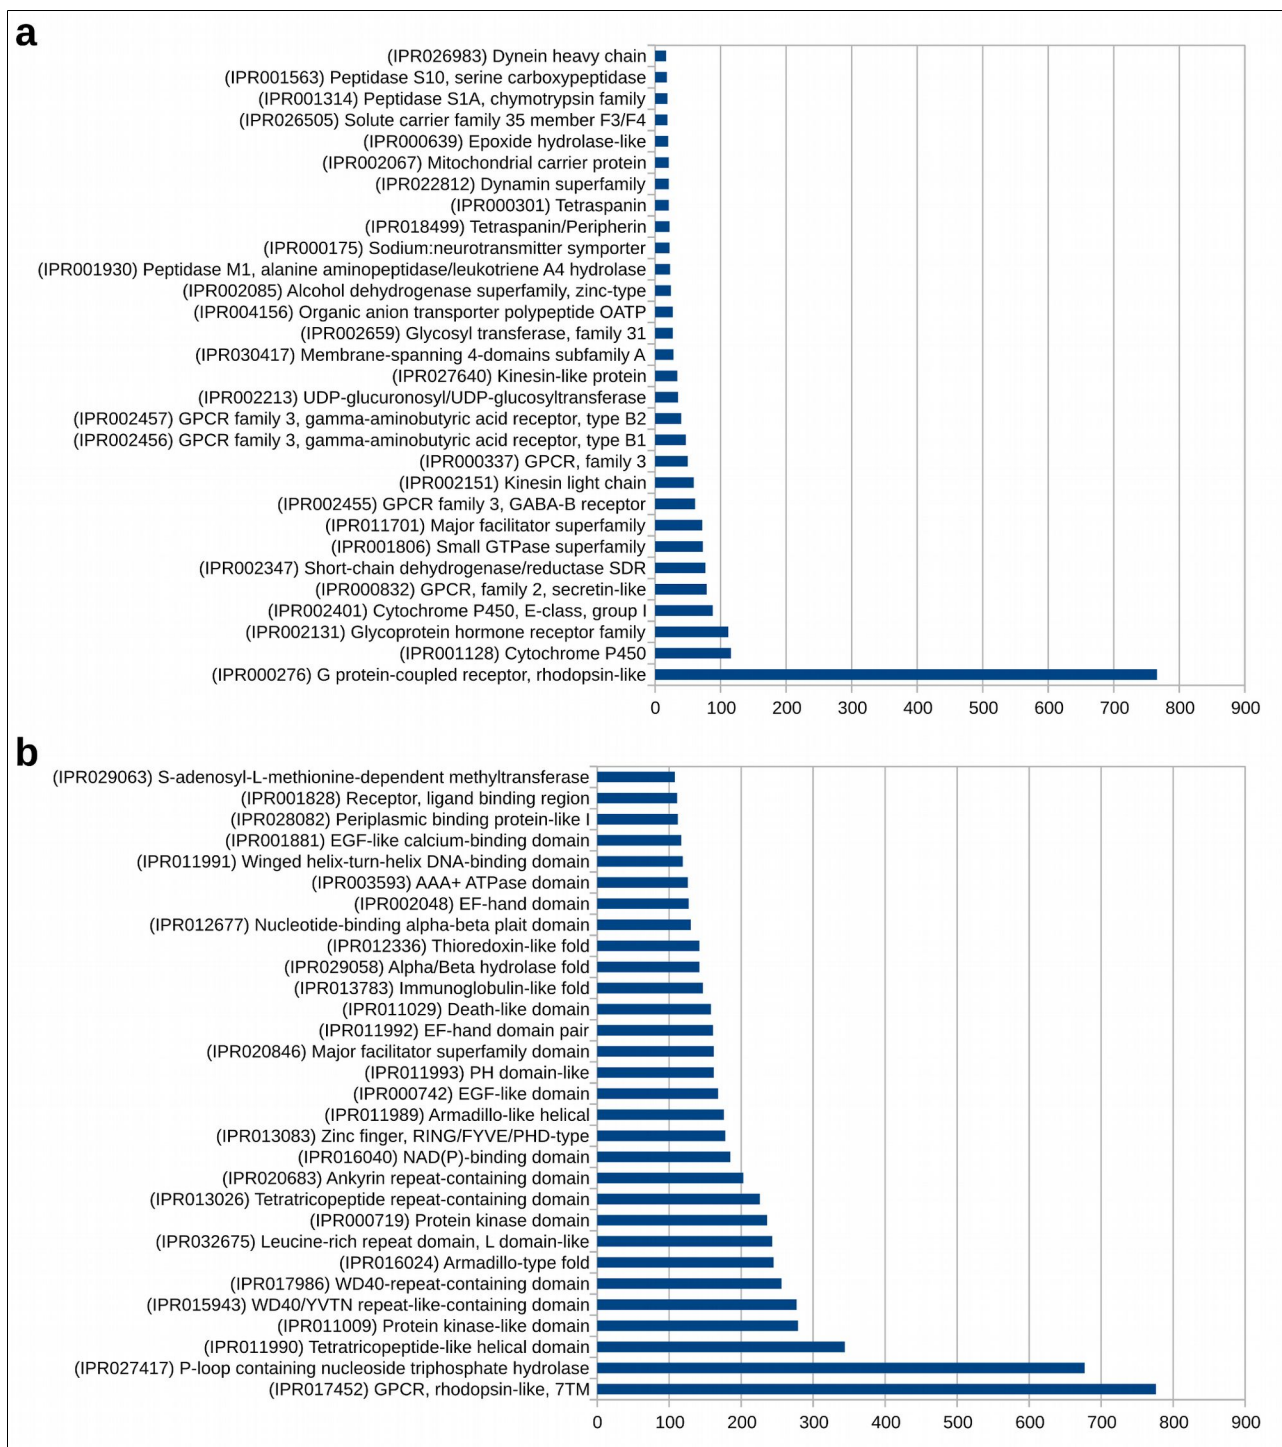

**Supplementary Figure S1: Summary of the functional annotation of the *Trichoplax* sp. H2 genome.**

**(a)** The thirty most abundant InterPro families. **(b)** The thirty most abundant InterPro domains.

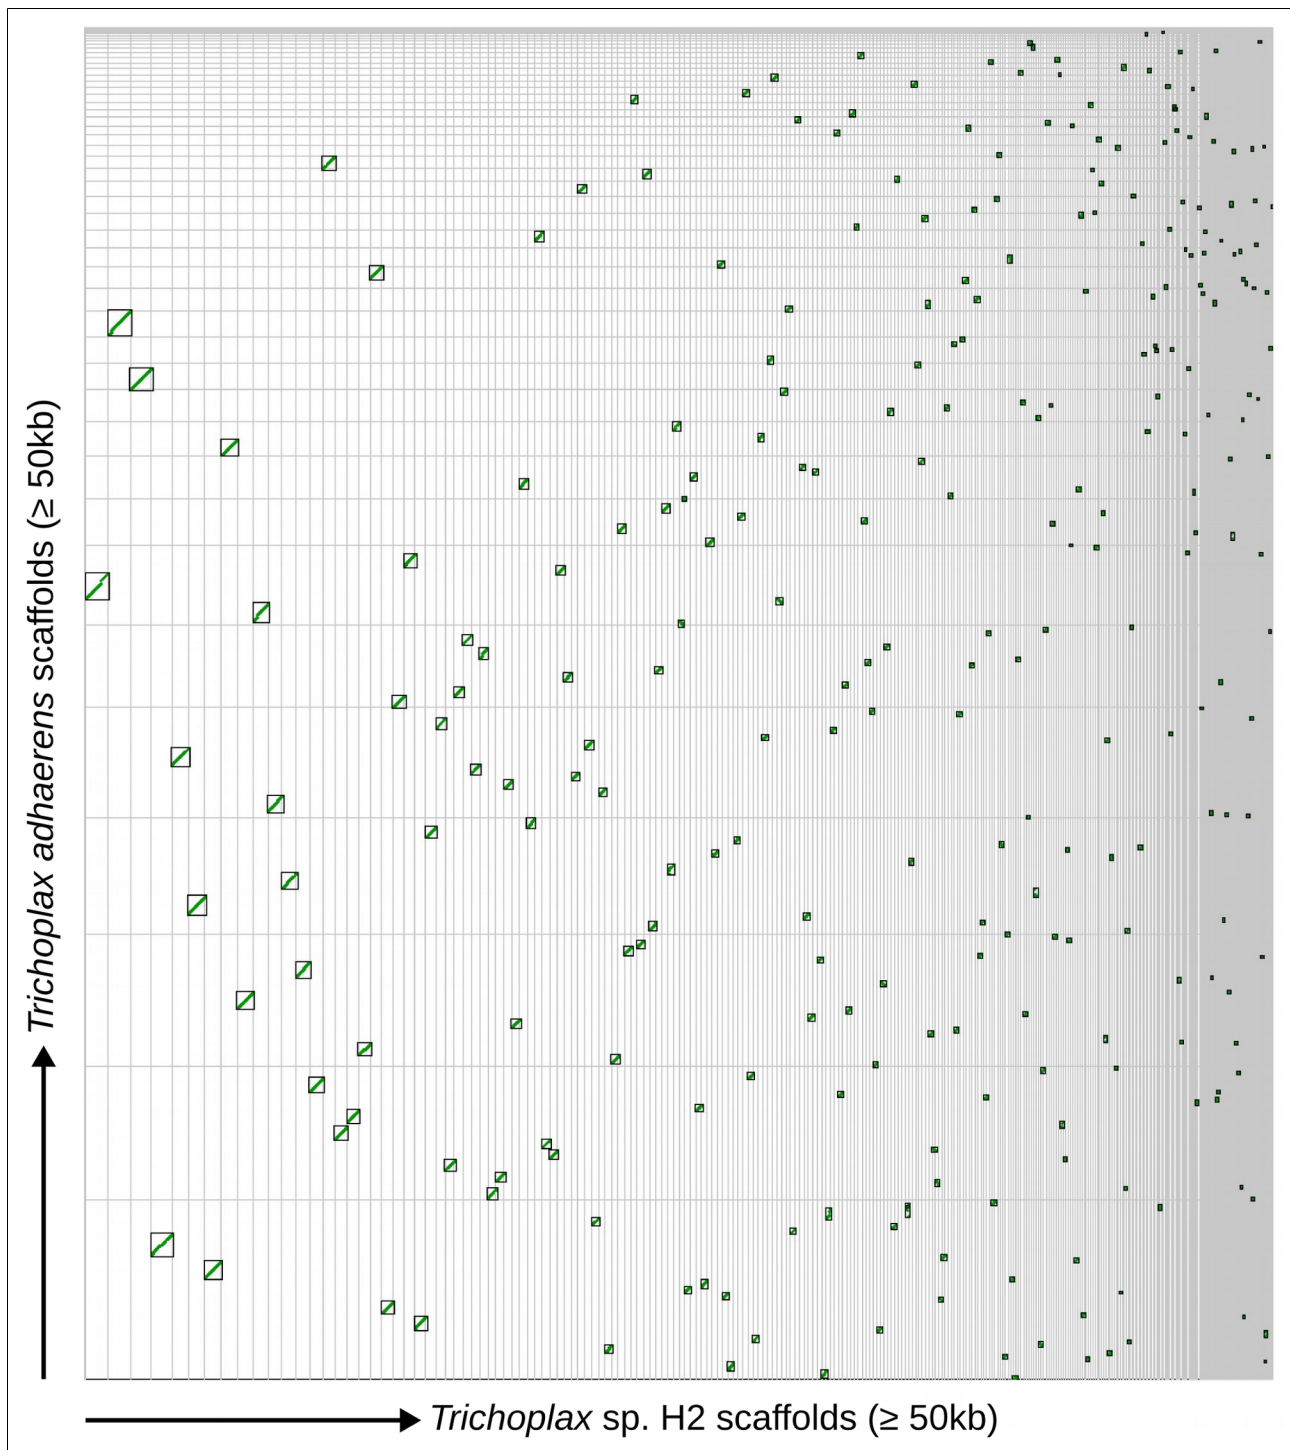

### Supplementary Figure S2: Comparison of the genomic organization

Dot-blot of the syntenic regions between the genome assemblies of *Trichoplax adhaerens* and *Trichoplax sp. H2* based on gene-models. Green dots surrounded by boxes fulfill criteria of synteny. For clarity only scaffolds of at least 50kb are included.

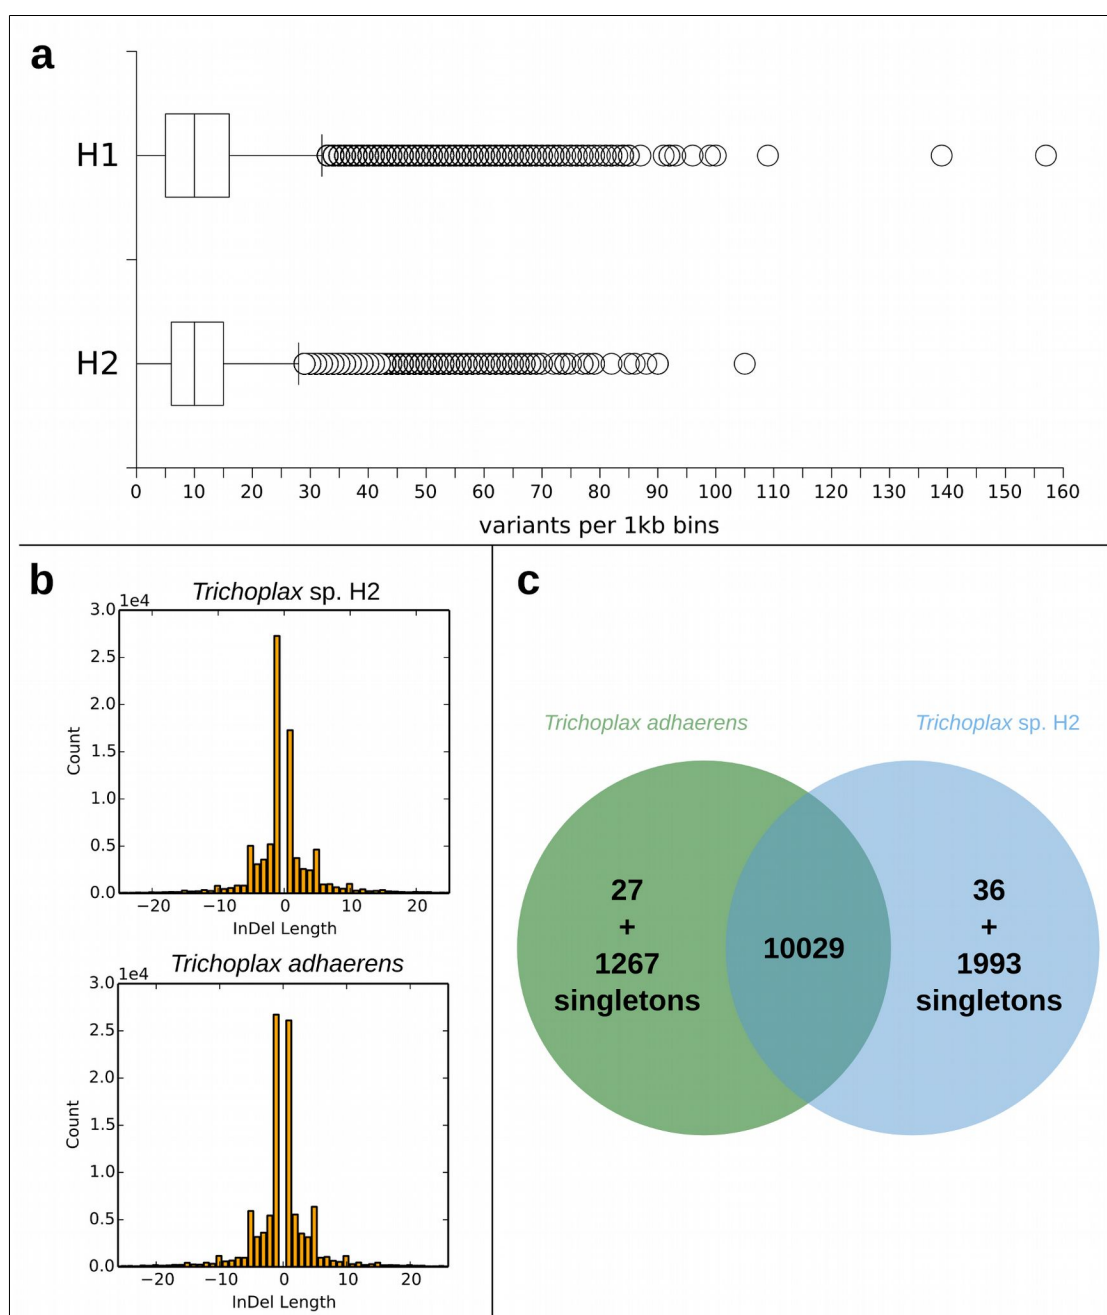

**Supplementary Figure S3: Variant analyses of the two *Trichoplax* genomes and orthologous clustering of gene models**

**(a & b)** Variant analyses of the two genomes using the genomic reads of *Trichoplax* sp. H2 for both genomes. **(a)** Boxplot showing single nucleotide polymorphisms (SNPs) per 1kb in the two genomes (box width = interquartile range, vertical line within box = median, circles = outliers, whiskers extend 1.5 times the interquartile range in both directions of the box' margin). **(b)** Count and length distribution of InDels. **(c)** Orthologous clustering of *Trichoplax adhaerens* and *Trichoplax* sp. H2 gene models. The two lineages share more than 10,000 orthologous clusters but possess a certain amount of singletons, possibly as a result of a combination of 1. differences in the calling of the evidence-based gene models 2. non-overlapping portions of the respective assemblies 3. lineage specific genes.

|               |   |        |     |     |     |     |     |     |     |      |      |      |      |      |     |                 |      |
|---------------|---|--------|-----|-----|-----|-----|-----|-----|-----|------|------|------|------|------|-----|-----------------|------|
| <b>Hhex</b>   |   | 711bp  |     |     |     |     |     |     |     |      |      |      |      |      |     |                 |      |
| scaffold_17   |   |        | 138 | 246 | 262 | 273 | 331 | 419 | 422 | 618  | 621  |      |      |      |     |                 |      |
| H1            |   |        | G   | T   | C   | G   | G   | T   | G   | G    | C    |      |      |      |     |                 |      |
| H1            | * |        | G   | C   | T   | A   | A   | T   | A   | A    | T    |      |      |      |     |                 |      |
| H2            |   |        | G   | C   | T   | A   | A   | T   | A   | A    | T    |      |      |      |     |                 |      |
| H2            | * |        | A   | T   | C   | G   | G   | G   | G   | G    | C    |      |      |      |     |                 |      |
| scaffold_37   |   |        |     |     |     |     |     |     |     |      |      |      |      |      |     |                 |      |
| <b>NK6</b>    |   | 651bp  |     |     |     |     |     |     |     |      |      |      |      |      |     |                 |      |
| scaffold_17   |   |        | 52  | 69  | 188 | 226 | 281 | 504 | 520 | 530  | 635  |      |      |      |     |                 |      |
| H1            |   |        | G   | C   | T   | T   | G   | C   | C   | G    | G    |      |      |      |     |                 |      |
| H1            | * |        | A   | C   | T   | C   | A   | T   | C   | A    | G    |      |      |      |     |                 |      |
| H2            |   |        | A   | C   | T   | C   | A   | T   | C   | A    | G    |      |      |      |     |                 |      |
| H2            | * |        | A   | T   | C   | T   | G   | C   | G   | A    | A    |      |      |      |     |                 |      |
| scaffold_37   |   |        |     |     |     |     |     |     |     |      |      |      |      |      |     |                 |      |
| <b>Bmp7</b>   |   | 1134bp |     |     |     |     |     |     |     |      |      |      |      |      |     |                 |      |
| scaffold_7    |   |        | 47  | 150 | 400 | 457 | 458 | 544 | 577 | 616  | 643  | 652  | 756  | 779  | 802 | <b>TGF beta</b> |      |
| H1            |   |        | T   | C   | A   | A   | A   | T   | A   | A    | C    | G    | A    | A    | A   | 1043            | 1059 |
| H1            |   |        | C   | T   | A   | T   | C   | C   | C   | G    | A    | G    | G    | G    | G   | C               | T    |
| H2            |   |        | C   | T   | A   | T   | C   | C   | C   | G    | A    | G    | G    | G    | G   | C               | C    |
| H2            |   |        | T   | C   | G   | A   | A   | C   | C   | A    | C    | A    | A    | A    | A   | C               | T    |
| scaffold_22   |   |        |     |     |     |     |     |     |     |      |      |      |      |      |     |                 |      |
| <b>PRKAG2</b> |   | 1287bp |     |     |     |     |     |     |     |      |      |      |      |      |     |                 |      |
| scaffold_3    |   |        | 222 | 257 | 549 | 597 | 723 | 775 | 837 | 1063 | 1099 | 1163 | 1212 | 1283 |     |                 |      |
| H1            | # |        | G   | A   | A   | T   | T   | G   | T   | T    | G    | G    | C    | T    |     |                 |      |
| H1            | * |        | A   | G   | G   | A   | C   | A   | C   | C    | T    | A    | A    | A    |     |                 |      |
| H2            |   |        | A   | G   | G   | A   | C   | A   | C   | C    | T    | A    | A    | A    |     |                 |      |
| H2            | # |        | G   | A   | A   | T   | T   | G   | T   | T    | G    | G    | C    | T    |     |                 |      |
| scaffold_13   |   |        |     |     |     |     |     |     |     |      |      |      |      |      |     |                 |      |

#### Supplementary Figure S4: Phasing of representative transcripts

Four examples of the allele comparison between *Trichoplax adhaerens* and *Trichoplax* sp. H2. Shown are the SNP positions of the phased CDS. A continuous color denotes a single phased block. Identical alleles are marked with \* or # and non-synonymous SNPs are framed by black boxes. If a SNP position falls into the region of a conserved domain this is indicated by a grey bar above. Note that the grey bar does not reflect exact length or position of the conserved domain within the complete CDS/protein. In the case of the placozoan bone morphogenetic protein (BMP) the two closest alleles between the two lineages differ in only one substitution (position 1043) which introduced a stop codon (red) in the H1 allele and cuts off the last third of the TGF-beta domain. Complete results and accessions for the 30 CDS are given in Supplementary Table S4.

**Supplementary Tables (as separate spreadsheets):**

**Supplementary Table S1: Statistics of the genome/transcriptome assembly and annotation**

Genome annotation statistics, transcriptome assembly summary, variant calling summary, examples of novel placozan genes, KEGG mapping results.

**Supplementary Table S2: Repeat analyses and comparison of the two placozoan genomes**

**Supplementary Table S3: Examples of *Trichoplax* sp. H2 CDS showing dN/dS values above 1.5**

**Supplementary Table S4: Details and accessions of the phased CDS of *Trichoplax* sp. H2 and *Trichoplax adhaerens***
